# Supplementary material for: Failure of cell cleavage induces senescence in tetraploid primary cells
Source: PubMed Central journal article supplement — Mol Biol Cell. 2014 Oct 15;25(20):3105–18. doi: 10.1091/mbc.E14-03-0844 (PMC4196863; doi:10.1091/mbc.e14-03-0844), 2014-10-15

# Supplemental Materials

*Molecular Biology of the Cell*

Panopoulos et al.

## **Supplemental Figure Legends**

**Supplemental Video 1.** REF52 control cells recorded over a period of 72 hr, one frame every 20 min. Recording was done with a 20X objective in DIC. Bar = 90  $\mu\text{m}$ . Note frequent and normal mitosis during the recording.

**Supplemental Video 2.** REF52 were treated with 10  $\mu\text{M}$  DCB for 24 hr, then released and recorded over a period of 72 hr, one frame every 20 min. Recording was done with a 20X objective in DIC. Bar = 90  $\mu\text{m}$ . Note that binucleate cells are abundant, and show normal motility, indicating complete recovery from DCB, but do not undergo mitosis.

**Supplemental Figure 1.** Enlarged image of Figure 6C. The arrow indicates a binucleate SA- $\beta$ -galactosidase positive cell. Scale bar: 20  $\mu\text{m}$ .

**Supplemental Figure 2.** Wide-field images (20X objective) of control random cycling REF52 cells (above), and REF52 transfected with siRNA to PRC1 (below) at 48 hr post-transfection with PRC1 siRNA and stained with anti- $\alpha$ -tubulin antibody. Abundant binucleate cells, large and flat, are present after transfection. Scale bars: 40  $\mu\text{m}$ .

Panopoulos Supplemental Figure 1

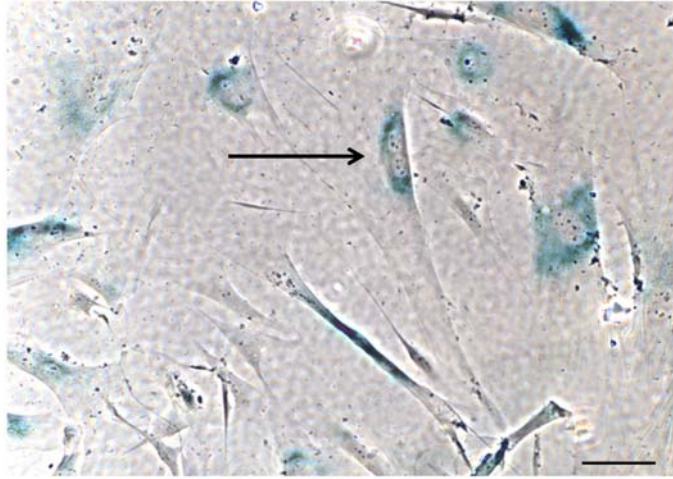

Panopoulos Supplemental Figure 2

REF52 Control

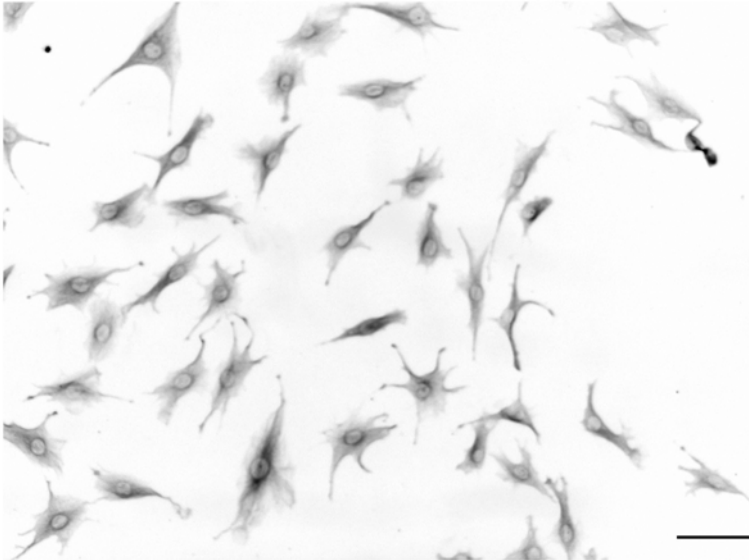

REF52 PRC1 siRNA

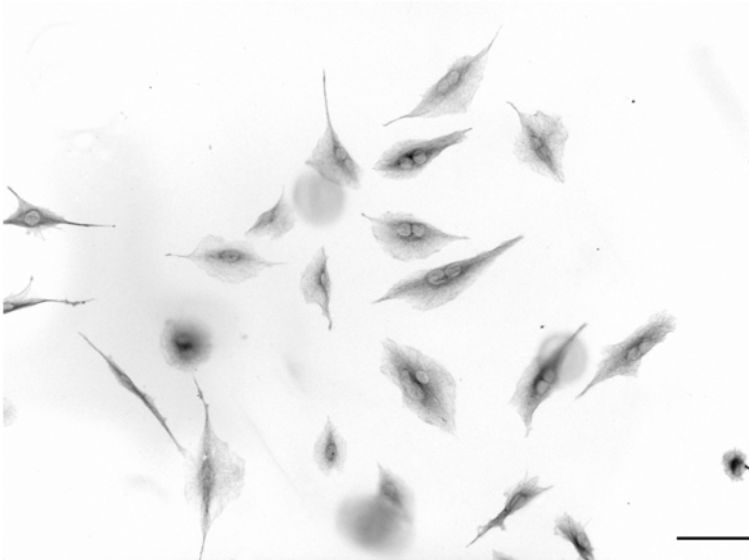

Supplement: supp_E14-03-0844v1_CombinedSupMats.pdf [file supp_E14-03-0844v1_CombinedSupMats.pdf]
